## **Network-targeted, multi-site direct cortical stimulation enhances working memory by modulating phase lag of low frequency oscillations**

Sankaraleengam Alagapan<sup>1,2</sup>, Justin Riddle<sup>1,2</sup>, Wei Angel Huang<sup>2</sup>, Eldad Hadar<sup>3</sup>, Hae Won Shin<sup>3,4</sup>, Flavio Fröhlich<sup>1,2,4,5,6,7</sup>

1 Carolina Center for Neurostimulation, University of North Carolina at Chapel Hill, Chapel Hill, NC 27599

2 Department of Psychiatry, University of North Carolina at Chapel Hill, Chapel Hill, NC 27599

3 Department of Neurosurgery, University of North Carolina at Chapel Hill, Chapel Hill, NC 27599

4 Department of Neurology, University of North Carolina at Chapel Hill, Chapel Hill, NC 27599

5 Department of Cell Biology and Physiology, University of North Carolina at Chapel Hill, Chapel Hill, NC 27599

6 Department of Biomedical Engineering, University of North Carolina at Chapel Hill, Chapel Hill, NC 27599

7 Neuroscience Center, University of North Carolina at Chapel Hill, Chapel Hill, NC 27599

Authorship Statement: SA, HS, and FF designed the experiments; SA, JR, WH, EH, and HS performed the electrophysiological recordings; SA, JR analyzed the data; and SA, JR, WH, EH, HS, and FF prepared the manuscript.

Conflict of interest: FF is the lead inventor of IP filed on the topics of noninvasive brain stimulation by UNC. FF is the founder, CSO and majority owner of Pulvinar Neuro LLC, which played no role in this research. The other authors declare no competing interests.

1 **Abstract:**

2 Working memory, an important component of cognitive control, is supported by the coordinated activation  
3 of a network of cortical regions in the frontal and parietal cortices. Oscillations in theta and alpha frequency  
4 bands are thought to coordinate these network interactions. Thus, targeting multiple nodes of the network  
5 with brain stimulation at the frequency of interaction may be an effective means of modulating working  
6 memory. We tested this hypothesis by identifying regions that are functionally connected in theta and alpha  
7 frequency bands and intracranially stimulating both regions simultaneously in participants undergoing  
8 invasive monitoring. We found that in-phase stimulation resulted in improvement in performance compared  
9 to sham stimulation. In contrast, anti-phase stimulation did not affect performance. In-phase stimulation  
10 resulted in decreased phase lag between regions within working memory network while anti-phase  
11 stimulation resulted in increased phase lag suggesting that shorter phase lag in oscillatory connectivity may  
12 lead to better performance. The results support the idea that phase lag may play a key role in information  
13 transmission across brain regions. More broadly, brain stimulation strategies that aim to improve cognition  
14 may be better served targeting multiple nodes of brain networks.

## 15 **Introduction:**

16 Working memory (WM) is an important component of cognition and supports higher cognitive functions in  
17 humans like fluid intelligence, decision making and learning. Impairment of WM is observed in many  
18 psychiatric and neurological disorders [1-3] and is often not addressed by current treatment strategies. Thus,  
19 approaches that can improve WM are required. The neural substrates of WM are spread across frontal,  
20 cingulate and parietal cortices [4-7] and are thought to be coordinated by cortical oscillations. Theta (4 – 8  
21 Hz) and alpha (8 – 12 Hz) oscillations are known to play a critical role in WM [8-11]. Given the spatially  
22 distributed nature of processing that takes place during WM tasks, the interaction between different regions  
23 that underlies WM can be captured in functional and effective connectivity analyses. Neuroimaging studies  
24 have revealed that fronto-parietal connectivity is a key functional component of WM in the brain [12-14] and  
25 some studies have found connectivity between frontal and temporal regions to be correlated with WM task  
26 performance [15, 16]. Electroencephalography (EEG) and magnetoencephalography (MEG) studies have  
27 shown that fronto-parietal connectivity may be characterized by interactions in different oscillatory  
28 frequency bands. Alpha band phase synchronization in fronto-parietal regions has been shown to be  
29 modulated by WM load [17, 18]. Theta band connectivity has been shown to increase with increased central  
30 executive demands [19, 20]. Deficits in WM are common in many neurological and psychiatric disorders in  
31 which connectivity is also altered [21-24]. Taken together, the neural substrate for WM is a network of brain  
32 regions and thus, any strategy that targets WM may be better-served by engaging multiple nodes of the  
33 network.

34 Noninvasive brain stimulation methods like transcranial magnetic stimulation (TMS) [25-28], transcranial  
35 direct current stimulation (tDCS) [29-31] and transcranial alternating current stimulation (tACS) [32-36] have  
36 allowed causal perturbations of specific regions or activity signatures involved in WM. More specifically,  
37 rhythmic TMS (rTMS), in which a periodic pulse train is applied, and tACS, in which a continuous sinusoidal  
38 alternating current is applied, allow for targeting neural oscillations by matching the stimulation frequency  
39 to the frequency of oscillations [37]. RTMS has been shown to improve WM performance when applied at  
40 theta frequency [38-40]. TACS in theta frequency band also leads to improvements in WM performance [33,  
41 36]. Most of these studies have focused on stimulating a single region. In contrast, studies in which multiple  
42 regions of WM network are targeted have yielded important insights into functional network properties.  
43 TACS studies have shown that stimulating fronto-parietal network using waveforms that have 0° phase offset  
44 (in-phase stimulation) result in improvement of WM performance while stimulating networks using  
45 waveforms that have 180° phase offset (anti-phase stimulation) result in deterioration of performance [34,  
46 35]. In-phase stimulation was hypothesized to cause synchronization of the fronto-parietal networks while

47 anti-phase stimulation was is hypothesized to cause de-synchronization. Neuroimaging during stimulation  
48 indicated increased blood oxygenation level dependent (BOLD) signal in WM regions during in-phase  
49 stimulation while functional connectivity increased with both in-phase stimulation and anti-phase  
50 stimulation [35]. The BOLD signal does not have milli-second temporal resolution and thus precluded any  
51 analysis of the changes in oscillatory network activity.

52 Compared to transcranial electric stimulation, direct cortical stimulation (DCS), in which electrical stimulation  
53 is applied directly on the cortical surface, offers higher spatial specificity. Additionally, intracranial EEG (iEEG)  
54 provides higher spatial resolution relative to EEG or MEG as well as higher temporal resolution relative to  
55 functional neuroimaging. Thus, by combining DCS and iEEG, it is possible to dissect functional networks with  
56 high spatio-temporal precision. This approach has been used for causally perturbing the electrophysiological  
57 and anatomical substrates of episodic memory [41-43], memory consolidation [44], and face processing [45,  
58 46]. DCS has also been used to target networks engaged in spatial memory, albeit stimulation resulted in  
59 impairment of performance [47]. In another study, direct stimulation of bilateral hippocampal regions with  
60 in-phase and anti-phase stimulation resulted in trend-level changes in performance [48]. Using this approach,  
61 we have shown that frequency-matched DCS of a region (left superior frontal gyrus) that exhibited low  
62 frequency oscillatory activity results in working memory improvement [49]. Here, we extended our  
63 stimulation protocol to target networks underlying working memory by stimulating two functionally  
64 connected regions simultaneously. We used a measure of phase synchronization, the weighted phase lag  
65 index, to identify regions that are functionally connected in alpha and theta frequency bands during a  
66 Sternberg WM task. We applied periodic pulse stimulation in-phase and anti-phase, matched to the  
67 frequency of functional interactions, to the two functionally connected regions, and compared the  
68 performance against sham stimulation. We hypothesized that in-phase stimulation would result in an  
69 increase in oscillatory functional connectivity relative to sham and thereby improve WM performance while  
70 anti-phase stimulation would result in a decrease in oscillatory functional connectivity relative to sham and  
71 thereby impair WM performance. While in-phase stimulation improved performance, anti-phase stimulation  
72 did not impair performance relative to sham. Analysis of functional connectivity properties in atlas-based  
73 WM (aWM) network revealed that functional connectivity was increased by both in-phase and anti-phase  
74 stimulation. However, in-phase stimulation decreased phase lag relative to sham between regions within the  
75 aWM network while anti-phase stimulation increased phase lag relative to sham suggesting a non-linear  
76 relationship between the phase lag of connections within a network and performance.

77

## 78 Results

79 We performed network-targeted stimulation (Figure 1A) in 3 participants implanted with subdural strips and  
80 stereo EEG electrodes for epilepsy surgery planning. The electrodes covered bilateral frontal, parietal and  
81 temporal cortices (Figure S1). Participants performed a Sternberg working memory task (Figure 1B) in a  
82 baseline session and a stimulation session. In the stimulation session, trains of biphasic pulses were applied  
83 to two pairs of electrodes. Stimulation was applied in-phase, in which stimulation was applied simultaneously  
84 between the two electrode pairs, and anti-phase, in which stimulation applied between one pair of  
85 electrodes was temporally offset from the other electrode pair by half the inter-pulse-interval of the pulse  
86 train (Figure 1C). Stimulation was applied during the encoding epoch of the Sternberg task. Sham stimulation,  
87 in which no DCS was applied, was used as a control as iEEG participants are unable to tell when stimulation  
88 is applied. The three stimulation conditions (in-phase, anti-phase, and sham) were randomly interleaved for  
89 each task block.

90

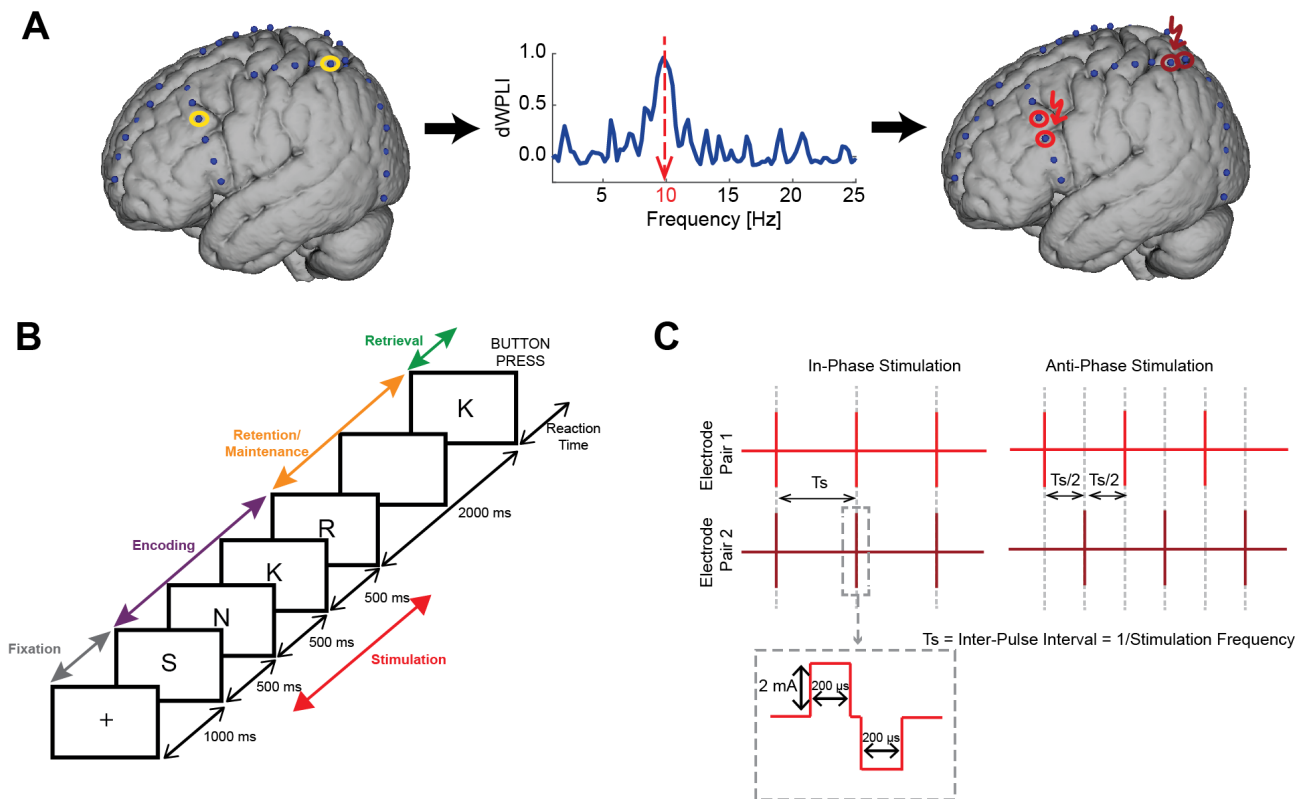

**Figure 1: Schematic of Network-Targeted Stimulation.**

- A. Intracranial EEG data from implanted electrodes, collected when participants performed WM task, are processed to identify functionally connected regions that are then targeted with direct cortical stimulation.
- B. Sternberg working memory task depicting the different epochs and timing of components of each epoch
- C. The stimulation paradigms used in the study. Each vertical red line denotes a biphasic pulse. In-phase stimulation consists of pulses applied simultaneously to functionally connected regions without any phase offset (time delay). Anti-phase stimulation consists of pulses applied with a phase offset of  $180^\circ$  (time delay of half the inter-stimulus interval  $T_s$ ). Dotted lines are provided for visual guidance

92

93 In the baseline session, the WM load, defined as the number of items to be held in WM, was varied pseudo  
94 randomly for each trial. The WM load for each participant was titrated according to performance in a short  
95 practice session (3, 5 for P1; 5, 7 for P2 and P3). Chi-squared test did not reveal any significant influence of  
96 list length on accuracy ( $\chi^2 = 0.434$ ,  $df = 2$ ,  $p = 0.805$ ). Analysis of reaction time did not reveal any significant  
97 influence of list length (Linear mixed effects model with list length as fixed factor and participant as random  
98 factor;  $F_{2, 175.51} = 0.630$ ,  $p = 0.534$ ). The reaction time and accuracy for individual participants are shown in  
99 Figure S2.

100 Analysis of functional connectivity using debiased weighted phase lag index (dWPLI) revealed oscillatory  
101 interactions in theta and alpha frequency bands. DWPLI measures the degree of consistency of phase lag  
102 between two signals and is not affected by volume conduction [50] making it an effective tool for identifying  
103 functional interactions in iEEG. In P1, electrodes that exhibited connectivity within the left frontal regions  
104 (superior frontal gyrus and inferior precentral gyrus) in theta band (4 Hz) were chosen. In P2, electrodes in  
105 the left frontal and parietal regions (inferior frontal junction and superior parietal lobule) that exhibited  
106 interactions in alpha band interactions were chosen. In P3, no strong functional interactions were observed  
107 (apart from the interactions between neighboring electrodes). Therefore, we chose electrodes that were in  
108 the putative WM network in the right hemisphere (middle frontal gyrus and superior intraparietal sulcus).  
109 We chose 10 Hz as stimulation frequency for P3 as alpha band synchronization between frontal and parietal  
110 regions has been shown to impact WM [17, 18]. The mean dWPLI for the electrodes chosen are shown in  
111 Figure 2A. Post-hoc analysis of spatial proximity of the chosen stimulation electrodes to canonical WM  
112 network identified from a meta-analytic atlas [51] revealed that both the electrode pairs in P2 and P3 were  
113 in or near regions active during WM (Figure 2B). In P1, one electrode pair was near the inferior frontal

114 junction, another prominent WM region [7] and one pair was on the superior frontal gyrus, a region that we  
115 have previously demonstrated to be involved in WM [49].

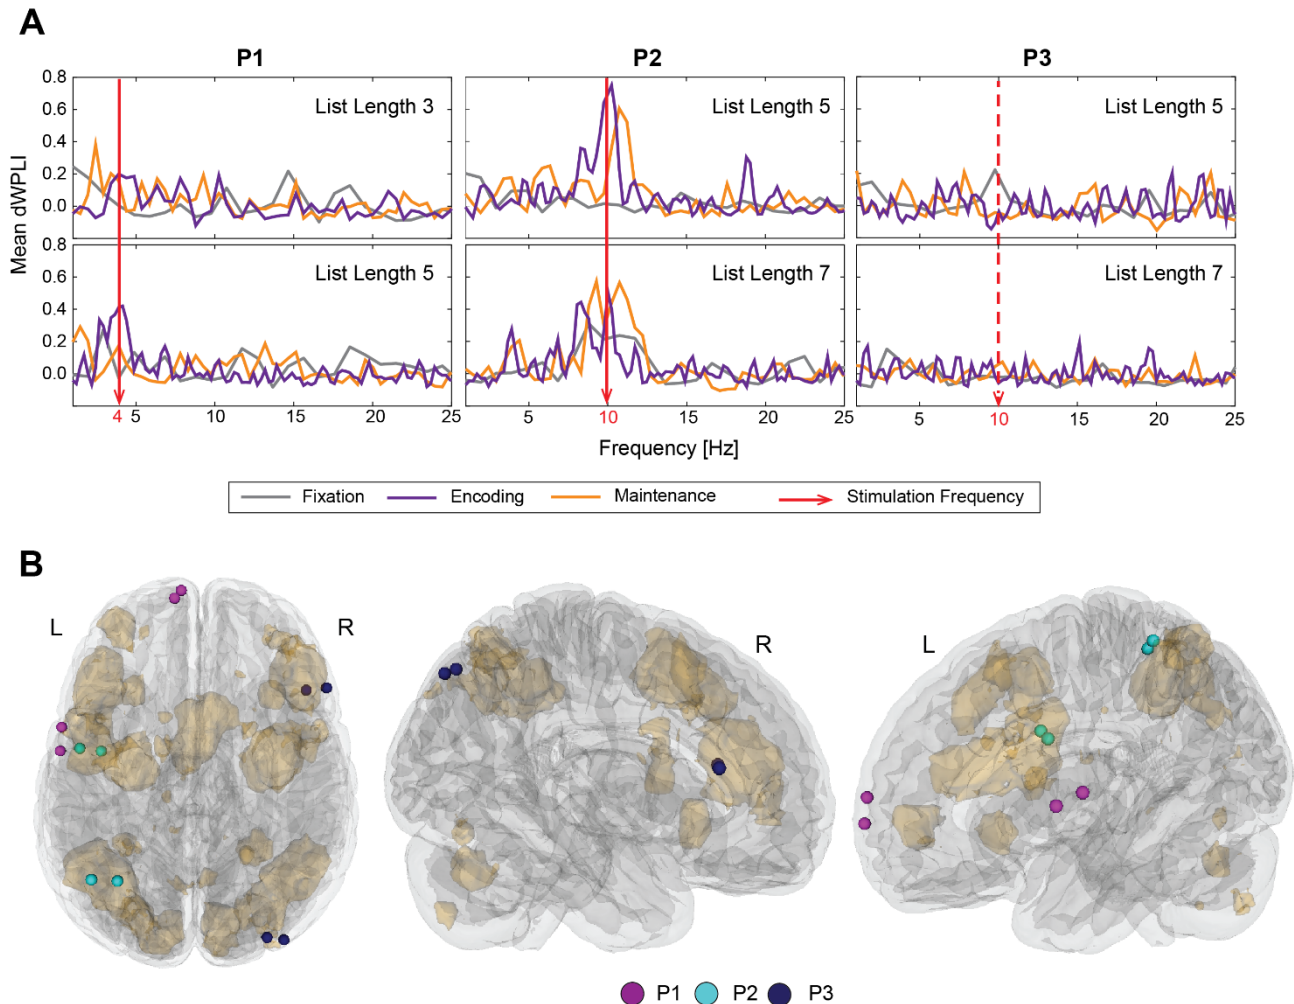

116

### Figure 2: Functional connectivity of stimulation electrodes

- A. Mean dWPLI for the stimulation electrodes for the different cognitive loads and the different epochs.
- B. The anatomical locations of the identified stimulation electrodes for the three participants. The beige shaded regions denote WM regions identified from meta-analyses of functional neuroimaging studies.

117 In stimulation session, participants performed the Sternberg task again but with only one level of WM load.  
118 Stimulation was applied between pairs of electrodes identified in the baseline session during the encoding  
119 epoch. In-phase stimulation resulted in increased accuracy relative to sham in all 3 participants (Figure 3,  
120 Top). Chi-squared test with all three conditions revealed a statistically significant association between  
121 condition and trial accuracy ( $\chi^2 = 7.315$ ,  $df = 2$ ,  $p = 0.026$ ). Further pairwise comparisons revealed that in-  
122 phase stimulation increased accuracy relative to sham ( $\chi^2 = 6.429$   $df = 1$ ,  $p = 0.011$ ), but there was no



123 difference in accuracy for anti-phase relative to sham ( $\chi^2 = 1.0913$  df = 1,  $p = 0.296$ ) or in-phase relative to  
124 anti-phase ( $\chi^2 = 1.847$  df = 1,  $p = 0.174$ ). Thus, network-targeted stimulation improved WM accuracy but only  
125 when both electrode pairs were stimulated simultaneously without phase-lag. Analysis of reaction time did  
126 not reveal any statistically significant effect of stimulation condition (Figure 3, Bottom, Linear mixed model  
127 with fixed factor stimulation condition and random factor participant;  $F_{2,223.42} = 0.545$ ,  $p = 0.581$ ).

128

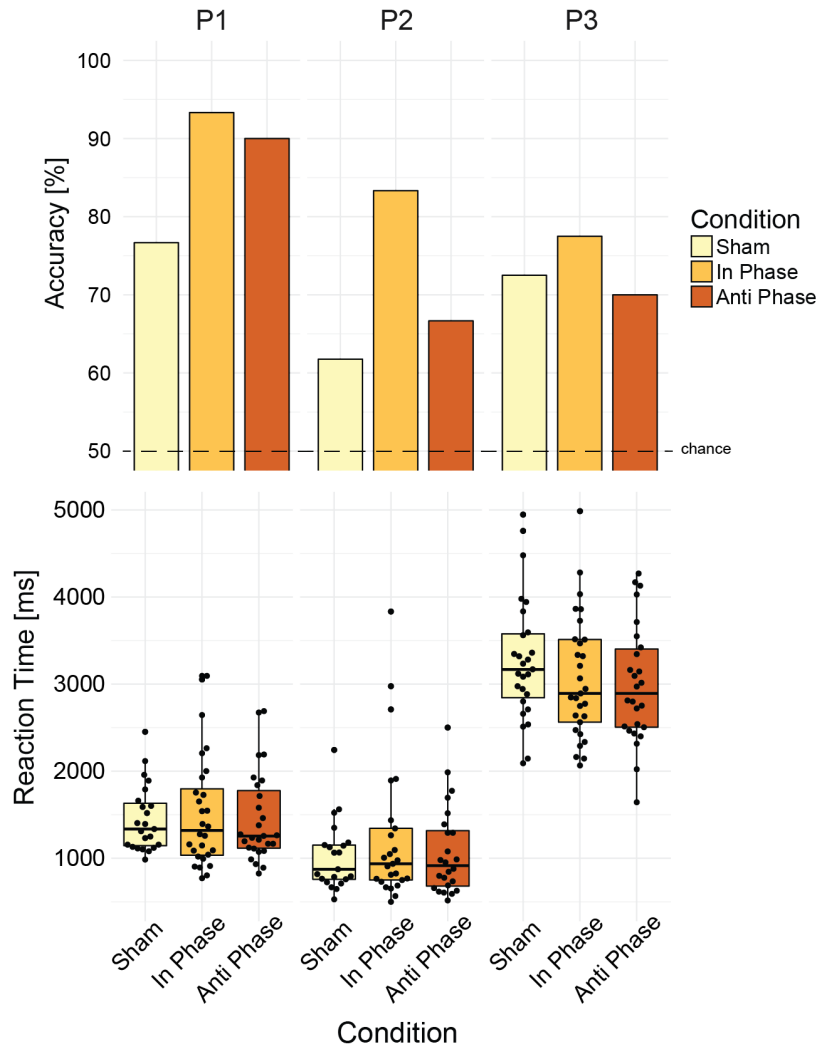

129

**Figure 3: Effect of network-targeted stimulation on WM performance**

In-phase stimulation increased accuracy relative to sham (Top). Stimulation did not affect reaction time (Bottom)



130 DCS introduces electrical stimulation artifacts in iEEG that need to be addressed before analyses can be  
131 performed. We used an ICA-based method, developed in our previous work [49], to remove the stimulation  
132 artifacts. Following artifact removal, we computed dWPLI between electrodes that were in the aWM  
133 network. As an exploratory measure, we computed magnitude-squared coherence, which is used widely in  
134 connectivity analysis of oscillatory networks. Coherence provides a complementary measure of functional  
135 connectivity as it accounts for the correlations in spectral power which is not captured by dWPLI. We  
136 restricted our analysis to the bands around the stimulation frequency for each individual participant.  
137 Additionally, we used a permutation-based approach to identify those network connections that exhibited  
138 statistically significant pairwise-differences between the conditions (in-phase stimulation vs sham  
139 stimulation, anti-phase stimulation vs sham stimulation, and in-phase stimulation vs anti-phase stimulation).  
140 This resulted in a network with sparse connections between regions within the WM network. The network  
141 connections obtained from coherence and dWPLI at the stimulation frequency for the 3 participants were  
142 pooled together for visualization in a chord diagram (Figure 4A). The nodes of the diagram represent an  
143 individual electrode while the edge between the nodes indicate the pair-wise difference in connectivity  
144 measure metric (coherence or dWPLI). Both in-phase stimulation and anti-phase stimulation resulted in more  
145 connections showing increased dWPLI than decreased, relative to sham. In contrast, the number of  
146 connections showing an increase were approximately equal to those showing a decrease when in-phase  
147 stimulation was contrasted against anti-phase stimulation. A similar trend was observed in connectivity  
148 obtained from coherence. To quantify the observed trend, we fit separate linear mixed models for pairwise  
149 difference in dWPLI and coherence with comparison as fixed factor and participant as random factor. In both  
150 cases, there was a significant effect of comparison on pairwise difference (dWPLI:  $F_{2, 486.18} = 26.921$ ,  $p < 0.001$ ;  
151 coherence:  $F_{2, 533.38} = 16.392$ ,  $p < 0.001$ ). Post hoc analysis using Tukey method revealed that the pairwise  
152 difference for in-phase vs sham and anti-phase vs sham were higher than in-phase vs anti-phase (Figure 4B,  
153  $p < 0.001$ ). The results from dWPLI and coherence suggest that contrary to our initial hypothesis, both in-  
154 phase stimulation and anti-phase stimulation increased functional connectivity relative to sham while there  
155 was no clear difference between the two stimulation conditions.

156 While these results may appear counter-intuitive, it should be noted that dWPLI is a measure of phase  
157 consistency and does not include any information regarding the actual phase difference. It is conceivable that  
158 both in-phase stimulation and anti-phase stimulation successfully engage the network due to the repeated  
159 periodic perturbation of the network and increased overall phase consistency. However, since the stimulation  
160 differed in phase lag between the targeted electrode pairs, in-phase and anti-phase may have impacted the  
161 specific phase lag between nodes in the network. To verify this, we computed phase lag at stimulation

162 frequency between electrode pairs that exhibited significant pairwise dWPLI difference between any of the  
163 three stimulation conditions i.e., phase lag corresponding to the edges depicted in the dWPLI chord diagram  
164 in Figure 4A. Phase lag was computed from the cross-spectrum of the iEEG signal during the stimulation  
165 epoch. We pooled the data of the three participants together, as the distribution of phase lag for individual  
166 participants did not satisfy the assumptions required for the circular statistics. There was a significant effect  
167 of comparison on the phase lag differences (Figure 4C; Watson-william test  $F_{2,488} = 3.6523$ ,  $p = 0.0266$ ). We  
168 found that in-phase stimulation resulted in an overall decrease in phase lag relative to sham ( $-0.114 \pm 1.310$   
169 radians; mean  $\pm$  sd) while anti-phase stimulation resulted in an overall increase in phase lag relative to sham  
170 ( $0.269 \pm 1.240$  radians). There was a negligible change in phase lag when in-phase stimulation was compared  
171 to anti-phase stimulation ( $0.018 \pm 1.165$  radians). These results indicate that while in-phase stimulation and  
172 anti-phase stimulation both increased phase consistency, they modulated phase lag in opposite directions.

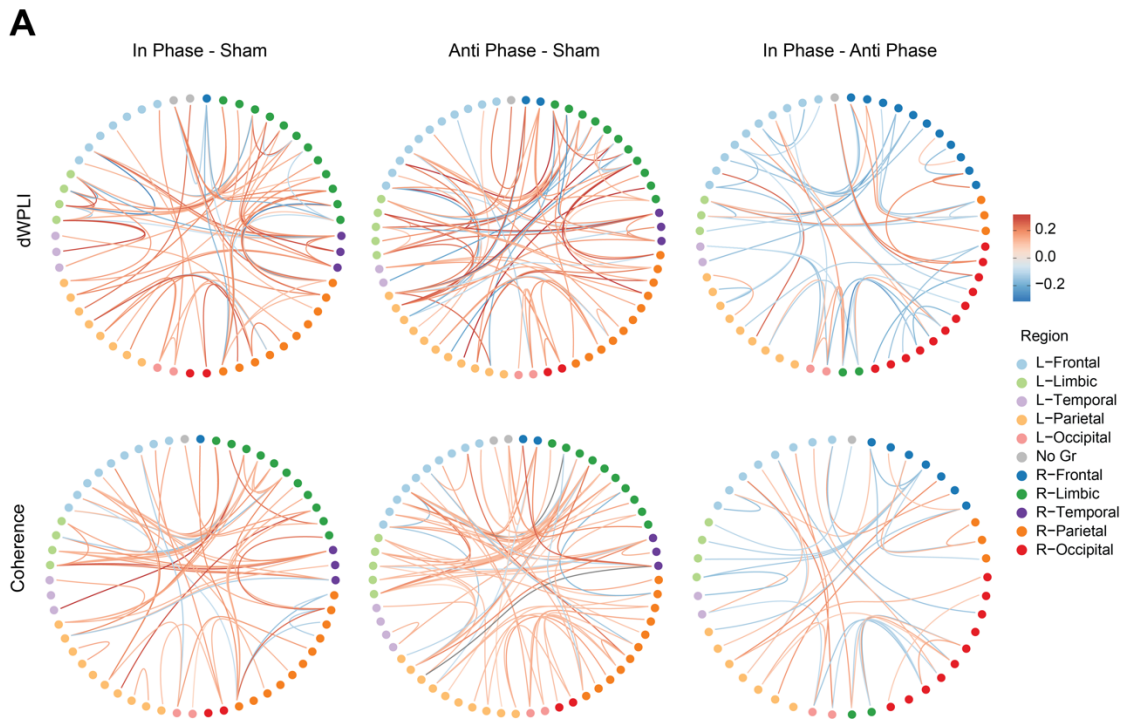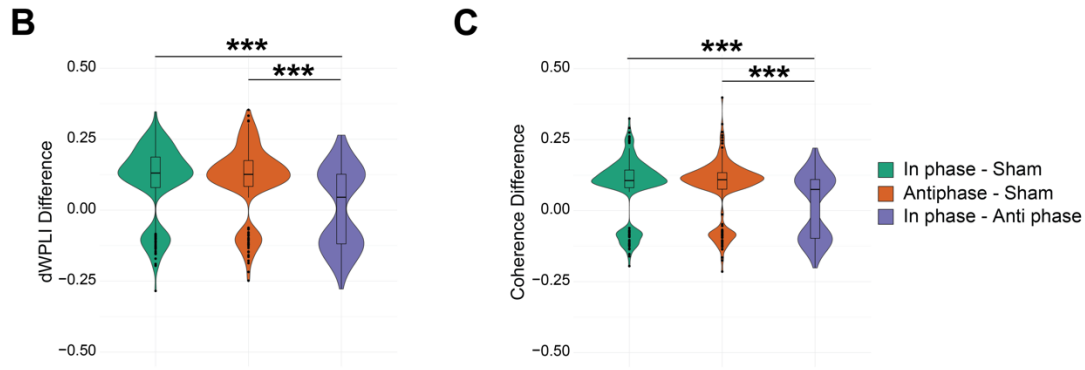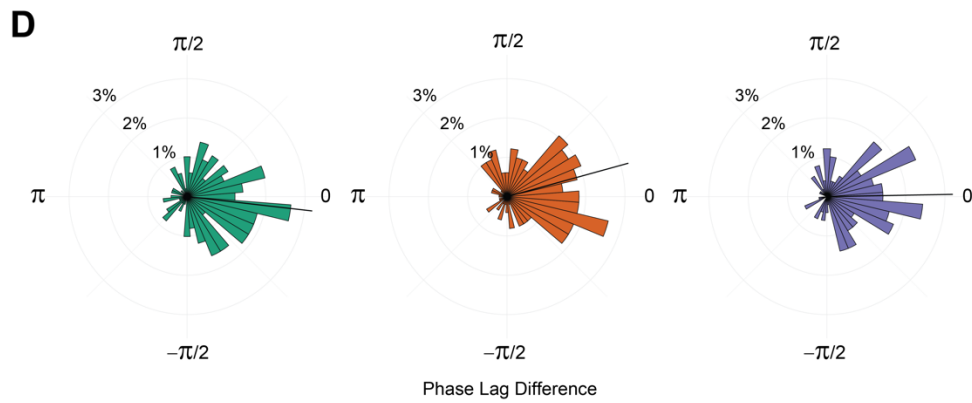

#### Figure 4: Effect of network-targeted stimulation on WM Network

- A. Chord diagrams representing the pairwise differences in dWPLI and coherence in the WM network across all three participants. The nodes represent electrodes; edges represent connectivity between regions; red edges denote a relative increase in the connectivity metric and blue edges denote a relative decrease in connectivity metric between the nodes. The edges depicted here have passed a permutation based statistical significance test ( $p < 0.05$ )
- B. Pairwise difference of dWPLI between stimulation conditions. In-phase vs sham and anti-phase vs sham were higher than in-phase vs anti-phase differences. \*\*\* denotes statistical significance at  $p < 0.001$  in a Tukey post-hoc test
- C. Pairwise difference of coherence between stimulation conditions. In-phase vs sham and anti-phase vs sham were higher than in-phase vs anti-phase differences. \*\*\* denotes statistical significance at  $p < 0.001$  in a Tukey post-hoc test
- D. Circular histogram denoting the pairwise differences in phase lag across the three comparisons for the three participants. Black line denotes the mean phase lag difference for each comparison.

174

#### 175 Discussion

176 In this study, we employed a network-targeted stimulation approach to engage the WM network and test if  
177 this approach can improve WM performance. We identified oscillatory networks underlying WM from iEEG  
178 using a phase synchronization measure and stimulated functionally connected electrodes. We found in-phase  
179 stimulation improved WM performance relative to sham stimulation in all 3 participants. Interestingly, we  
180 found that both in-phase and anti-phase stimulation increased functional connectivity relative to sham.  
181 However, the effect of the two stimulation conditions on phase lag was opposite such that in-phase  
182 stimulation decreased phase lag and anti-phase stimulation increased phase lag relative to sham. The  
183 increased functional connectivity from in-phase stimulation and anti-phase stimulation may have been due  
184 to the periodic input of DCS into the WM network that aligned the phase of electrical activity between  
185 multiple regions albeit at different lags. Our results suggest that the differential effect on phase lag may have  
186 contributed to the behavioral modulation. Phase synchronization has been hypothesized to enable interareal  
187 communication by aligning periods of excitability across regions or by enabling spike timing dependent  
188 plasticity [52]. Our electrical stimulation occurred at a time scale faster than the typical timeframe for  
189 observing plasticity, suggesting that our in-phase stimulation may have aligned periods of excitability across  
190 regions that enabled enhanced communication. While in-phase stimulation improved performance, we did  
191 not observe any impairment in performance with anti-phase stimulation. In-phase stimulation may have

192 reduced communication delay within an optimal window in which information may be effectively transmitted  
193 between regions resulting in improvement in performance. In contrast, anti-phase stimulation may have  
194 resulted in increased communication delay outside this optimal window which is inconsequential for  
195 information transmission and integration. Further studies are required to confirm this specific hypothesis.

196 Our results follow tACS studies that have shown behavioral effects of stimulation in WM tasks, albeit we  
197 observe improvements in accuracy while improvements in reaction times are more commonly reported.  
198 Polania et al. [34] observed a decrease in reaction time with in-phase stimulation and an increase in reaction  
199 time with anti-phase stimulation relative to sham. Violante et al. [35] observed a decrease in reaction time  
200 for in-phase stimulation relative to sham and anti-phase stimulation while there was no difference between  
201 sham and anti-phase stimulation, similar to what we observe. In addition, Violante et al. report increased  
202 BOLD signal functional connectivity increases in WM network for both in-phase and anti-phase stimulation.  
203 Although the functional connectivity from BOLD signal quantifies interactions at a slower timescale relative  
204 to what is observed in iEEG, these results support our observation that both in-phase and anti-phase  
205 stimulation resulted in increased functional connectivity.

206 We used a hybrid data-driven approach to restrict our analyses to putative WM networks in the three  
207 participants. The use of atlas-based priors allowed us to control the dimensionality of our variable of interest,  
208 which is the functional interactions between brain regions involved in WM; and permutation-based statistics  
209 allowed us to account for false positives. The WM network atlas we used was derived from a meta-analysis  
210 of 1091 studies that localized regions that show consistent activation across a variety of WM studies [51].  
211 However, it must be noted that BOLD activity of regions often corresponds to iEEG activity in the high  
212 frequency broadband activity (30 – 130 Hz) [53] with lower correlations between lower frequency band  
213 activity. Therefore, it is conceivable that we may have excluded regions that exhibited task-related  
214 connectivity. Given the heterogeneity and the small sample size, we motivated this decision as a necessary  
215 trade-off for generalizability at the cost of an exhaustive naïve data-driven approach. Even so, we found task-  
216 related functional connectivity between regions in or near the aWM network in participants P1 and P2. In P1,  
217 we found theta band connectivity between superior frontal gyrus and precentral gyrus. Although superior  
218 frontal gyrus is not a part of the aWM network, our previous work has shown it may indeed play a role in  
219 WM. In P2, we found alpha band connectivity within the aWM network and stimulation resulted in the  
220 highest improvement among the three participants. In P3, even with electrodes close to the aWM network,  
221 we did not observe any significant functional interaction. This may be due to variability in the functional  
222 recruitment of brain regions for this participant. While stimulation resulted in an improvement in WM  
223 accuracy, the effect in P3 was weaker than the other two participants presumably due to the decreased

224 recruitment of these regions by the task. However, the region of cortex activated by intracranial direct  
225 cortical stimulation extends farther than the immediate vicinity of the stimulation electrodes on the order of  
226  $\sim 50 \text{ mm}^3$  [54, 55] while the spatial extent of LFP recordings is a few millimeters [56]. Thus, stimulation may  
227 have spread into neighboring regions that are known to be canonically activated by WM task demands.

228 Oscillations in the theta and alpha frequency bands have been shown to support WM in many studies [57,  
229 58] with increased oscillatory power as a marker for synchronization. Phase synchronization between brain  
230 regions in alpha and theta frequency bands have been shown to underlie many memory processes (see  
231 reviews [52, 59]) with theta band activity implicated in top-down control [34, 60, 61] and alpha band activity  
232 implicated in suppression of irrelevant information [62, 63]. Theta band synchronization has been observed  
233 between fronto-temporal and fronto-parietal regions in working memory tasks [64-67]. While fronto-parietal  
234 synchronization in alpha band has been associated with cognitive control and visuospatial attention [68],  
235 interareal synchrony has been observed to be modulated by WM load in the retention period [17, 69].  
236 Supporting these observations, we found alpha and theta band connectivity in our participants. The  
237 variability in the frequency at which interaction was found may be due to differences in strategy [70], with  
238 theta being dominant in strategies where sequential information is encoded while alpha being dominant in  
239 strategies where competing information is suppressed. Alternately, the differences could be driven by the  
240 difference in regions between which functional connectivity is observed. We observed theta between  
241 electrodes within frontal regions while alpha was observed between electrodes in frontal and parietal  
242 regions. The studies mentioned above are constrained by the limitations of EEG, which has poor spatial  
243 resolution and is highly susceptible to volume conduction. The use of iEEG and dWPLI enabled us to address  
244 these limitations and provide a more fine-grained picture of the functional interactions.

245 While these results provide important insight into the role phase lag may play in coordinating working  
246 memory, the heterogeneity and the small sample size limits the interpretation to a general population.  
247 Additionally, the phase lag between stimulation sites was not taken into consideration as the initial  
248 hypothesis was based on the consistency of phase synchronization. In contrast to our approach, Kim et al.  
249 [47] stimulated hubs of a memory retrieval network at the phase lag observed between the two nodes but  
250 found that stimulation impaired performance. Our results imply that choosing a phase lag that is shorter than  
251 the observed phase lag may be beneficial. The choice of stimulation parameters was limited to in-phase  
252 stimulation and anti-phase stimulation to ensure enough trials in each condition for statistical analysis.  
253 However, this meant that we were not able to directly confirm if the effect is frequency-specific. Further  
254 studies incorporating arrhythmic stimulation as used in some TMS studies can be used to establish the  
255 frequency specificity of stimulation effects [40, 71].

256 While many studies quantify phase synchronization as consistency in phase differences, very few studies have  
257 focused on the phase lag between regions [34]. Given recent findings on phase-dependent information  
258 processing [72, 73] our result highlights the importance of considering phase information when studying  
259 functional interactions between brain regions. Overall, these findings advance our understanding of network-  
260 targeted stimulation for improving cognition in humans. Our results provide causal evidence that networks  
261 of brain regions are critical to cognition [74, 75] and optimal stimulation may require multi-site stimulation.  
262 This work may ultimately lead to therapeutic benefits for cognitive deficits that accompany many  
263 neurological and psychiatric disorders.

## 264 **Methods:**

### 265 *Participants:*

266 All experimental procedures were approved by the Institutional Review Board of University of North Carolina  
267 at Chapel Hill and informed consent was obtained from participants. Participants were recruited by invitation  
268 from patients who underwent invasive monitoring for epilepsy surgery planning. The participant clinical  
269 information is provided in Table 1. The location of electrodes in all participants were completely dictated by  
270 the clinical needs of the individual participant. See Figure S1 for the electrode coverage.

271

**Table 1: Clinical Information of Participants**

| Participant ID | Sex | Age | Seizure Onset Zones                                |
|----------------|-----|-----|----------------------------------------------------|
| P1             | F   | 20  | Bilateral hippocampus and temporal lobes           |
| P2             | M   | 24  | Bilateral hippocampus, amygdala, postcentral gyrus |
| P3             | F   | 46  | Bilateral posterior frontal cortex                 |

272

### 273 *Working Memory Task:*

274 Participants performed a Sternberg working memory task that has been previously used in ECoG studies [11,  
275 49, 76]. The Sternberg task allows a separation of different cognitive processes involved in working memory  
276 into different epochs: encoding, maintenance, and retrieval (Figure 1 B). Each trial began with a fixation cross  
277 presented for 1000 ms. In the encoding epoch, participants were presented with a sequence of letters from  
278 the English alphabet one letter at a time. Each letter was presented for 500 ms. Following the encoding  
279 epoch, a blank screen was presented for 2000 ms which served as the maintenance epoch. Next, a single  
280 letter (probe) was presented on the screen for 3000 ms. The participants were instructed to indicate if the



281 probe was present in the encoding epoch or not using custom joysticks that interfaced with the task  
 282 administration laptop through a USB response box (Black Box Toolkit, Sheffield, UK). P3 was not able to use  
 283 the joysticks due to history of stroke affecting motor function in their right hand and responded using the  
 284 keyboard of the laptop with their left hand only. The task was programmed in Matlab using Psychtoolbox  
 285 [77].

286 Participants completed the task in two sessions – a baseline session and a stimulation session. In the baseline  
 287 session, the task consisted of memory arrays of two different lengths (WM load). In the stimulation session,  
 288 the WM load was fixed to maximize the number of trials in each stimulation condition. The experimental  
 289 parameters used for the participants are listed in Table 2.

**Table 2: Experimental Parameters for the Participants**

| Participant ID | Baseline |                 | Stimulation |                                     | Stimulation Electrode Pairs Location                                     | Stimulation Frequency |
|----------------|----------|-----------------|-------------|-------------------------------------|--------------------------------------------------------------------------|-----------------------|
|                | WM Load  | No. Trials/Load | WM Load     | No. Trials/Condition                |                                                                          |                       |
| P1             | 3,5      | 30              | 5           | 30                                  | Left anterior superior frontal gyrus, Left inferior precentral sulcus    | 4 Hz                  |
| P2             | 5,7      | 40              | 7           | 30 in-phase, 36 anti-phase, 34 Sham | Left inferior frontal junction, left superior parietal lobule            | 10 Hz                 |
| P3             | 5,7      | 40              | 5           | 40                                  | Right anterior middle frontal gyrus, right superior intraparietal sulcus | 10 Hz                 |

290

291 *ECoG Data Acquisition and Direct Cortical Stimulation:*

292 ECoG data were recorded using a 128-channel EEG system (NetAmps 410, Electrical Geodesics Inc, Eugene,  
 293 Oregon, United States) at 1000 Hz sampling rate. Stimulation was delivered using Cerestim M96 cortical  
 294 stimulator (Blackrock Microsystems, Salt Lake City, Utah, United States). Stimulation consisted of a train of  
 295 biphasic pulses 2 mA in amplitude, 200  $\mu$ s in duration per phase of the biphasic pulse with a 55  $\mu$ s interval  
 296 between the positive going and negative going phase. The inter-pulse-interval was adjusted according to the  
 297 stimulation frequency. Stimulation was applied between two pairs of electrodes identified from functional

298 connectivity analysis as described in the next subsection. The timing of pulses between the two pairs was in-  
299 phase, i.e., stimulation was applied simultaneously between the two electrode pairs (Figure 1C). We  
300 hypothesized that in-phase stimulation would improve WM performance. The active control was anti-phase  
301 stimulation, i.e., stimulation between the first pair and second pair was offset by half the inter-pulse-interval  
302 (Figure 1C). Both in-phase and anti-phase stimulation was time-locked to the start of the encoding epoch.  
303 Stimulation was triggered using Matlab wrapper functions provided by the manufacturer of the cortical  
304 stimulator. In addition, a control condition where no stimulation was applied (sham) was also included to  
305 account for any non-specific effects of stimulation.

### 306 *Data Analysis*

307 All data analysis was performed using custom written Matlab scripts utilizing functions from the EEGLAB [78]  
308 and Fieldtrip toolboxes [79]. Electrodes over seizure focus were excluded from analysis.

### 309 *Selection of Stimulation Electrodes:*

310 ECoG data collected during the baseline session was used to determine functionally connected electrodes.  
311 The continuous data was band-pass filtered between 1 and 50 Hz using an FIR filter and re-referenced to the  
312 average of all intracranial electrodes using functions from EEGLAB toolbox. The data was then segmented  
313 into trials containing the different epochs. Functional connectivity was determined using debiased weighted  
314 phase lag index square (dWPLI) implemented in Fieldtrip toolbox. The measure is a composite of phase lag  
315 index, which captures consistency in phase lag between two time oscillatory signals [80], and the imaginary  
316 part of coherence which ignores zero phase lag interactions [81]. DWPLI has been shown to provide a better  
317 estimate of phase-synchronization in the presence of volume conduction and the debiased estimate has  
318 higher statistical power [50]. DWPLI was computed for the fixation, encoding and retention epochs  
319 separately. The strength of functional connectivity was strongest between neighboring electrodes followed  
320 by electrodes within the same anatomical region, i.e., frontal cortex or parietal cortex. Since we were  
321 interested in modulating long-range functional connectivity, we ignored electrode pairs that were neighbors.  
322 In addition, connections that were present in the fixation epoch and between electrodes over seizure foci  
323 were ignored as the former may reflect preparatory attentional components of network activity and the  
324 latter may reflect pathological connectivity.

### 325 *Removal of electrical stimulation artifacts*

326 Electrical stimulation artifacts were removed using an independent component analysis (ICA) based approach  
327 as demonstrated in our previous work [49]. Artifacts appear as stereotypical waveforms in iEEG signals. Blind

328 signal separation using ICA separates the iEEG signal into components that contain only artifact waveforms  
329 and other components that contain the rest of the signal. The components containing artifacts were then  
330 rejected and the remaining components were used to reconstruct the artifact free signal. We used the  
331 infomax algorithm [82] available as a part of EEGLab toolbox for computing independent components.  
332 Following artifact suppression, the signals were re-referenced to the average of all signals.

### 333 *Estimation of functional connectivity*

334 DWPLI was computed for the stimulation session (epoched by stimulation condition) in the same manner as  
335 the baseline session (epoched by WM load) using functions from EEGLab and Fieldtrip toolboxes. In addition,  
336 coherence was also computed for the stimulation session. Adjacency matrices were derived from a 3 Hz  
337 band centered on the frequency of interest. Phase lag was derived from the mean cross-spectrum across  
338 trials in a 2 Hz band centered on the frequency of stimulation. For pairwise comparisons between stimulation  
339 conditions, the difference in adjacency matrices were computed. Statistical significance was computed using  
340 a permutation-based approach. Trial labels were shuffled 1000 times, and adjacency matrices were  
341 computed for each condition. Pairwise differences were computed as above to generate a null distribution.  
342 Any pairwise difference in the non-shuffled adjacency matrices that were greater (or lesser) than 95% of the  
343 null distribution differences were deemed statistically significant. Chord diagrams were plotted using ggraph  
344 and igraph packages written in R.

### 345 *Identification of electrode locations*

346 3D Slicer [83] was used to analyze and extract electrode locations from CT images obtained after implantation  
347 of subdural electrodes (post-OP CT). Electrode locations were determined manually using the post-OP CT  
348 image by placing fiducials in areas of high activation in the CT. The post-OP CT was co-registered to pre-OP  
349 MRI in Slicer. The anatomical locations of the electrodes were determined by co-registering the pre-OP MRI  
350 image to the MNI Atlas [84], recomputing electrode locations in the MNI space, transforming these locations  
351 to Talairach space, and using the Talairach Client [85] to obtain the label of the region nearest to the  
352 coordinate representing electrode location.

### 353 *Determining atlas-based WM network*

354 We used a meta-analysis-based approach to identify regions activated by a variety of WM tasks. Using the  
355 Neurosynth database, we acquired the association test map for 'Working Memory' that was derived from  
356 1091 studies. The map consisted of z-scores, corrected with false discovery rate (FDR) at an alpha value of  
357 0.01, from a two-way ANOVA testing for the presence of a non-zero association between the term 'Working

358 Memory' and voxel activation [51]. We defined 8 mm regions of interest (ROIs) around each electrode in the  
359 Montreal Neurological Institute (MNI) space using custom written scripts and the MarsBaR toolbox in SPM12  
360 [86, 87]. Next, we determined the z-scores from the association map within these ROIs (electrodes) and  
361 computed the mean z-score for each electrode. Any electrode that had a mean z-score greater than 0 was  
362 defined to be part within the aWM network and was included in analysis.

### 363 *Statistical Analysis*

364 All statistical analyses were performed using custom-written scripts in R. Linear mixed models were fitted  
365 using '*lmerTest*' package [88]. The package uses a Satterthwaite approximation for degrees of freedom for  
366 ANOVA. Post-hoc analyses consisted of pairwise comparisons with Tukey adjustments and were computed  
367 using '*emmeans*' package. Circular statistics were computed using '*circular*' package [89].

### 368 **Acknowledgments**

369 The authors thank the members of the Frohlich Lab for their valuable input. The authors also thank the EEG  
370 technicians at the UNC Epilepsy monitoring unit for their generous help with the iEEG recordings.

### 371 **Funding**

372 Research reported in this publication was supported in part by the National Institute of Mental Health of  
373 the National Institutes of Health under Award Numbers R01MH101547 and R21MH105557, National  
374 Institute of Neurological Disorders and Stroke of the National Institutes of Health under award number  
375 R21NS094988-01A1. The content is solely the responsibility of the authors and does not necessarily  
376 represent the official views of the National Institutes of Health.

377 **Supplementary Information**

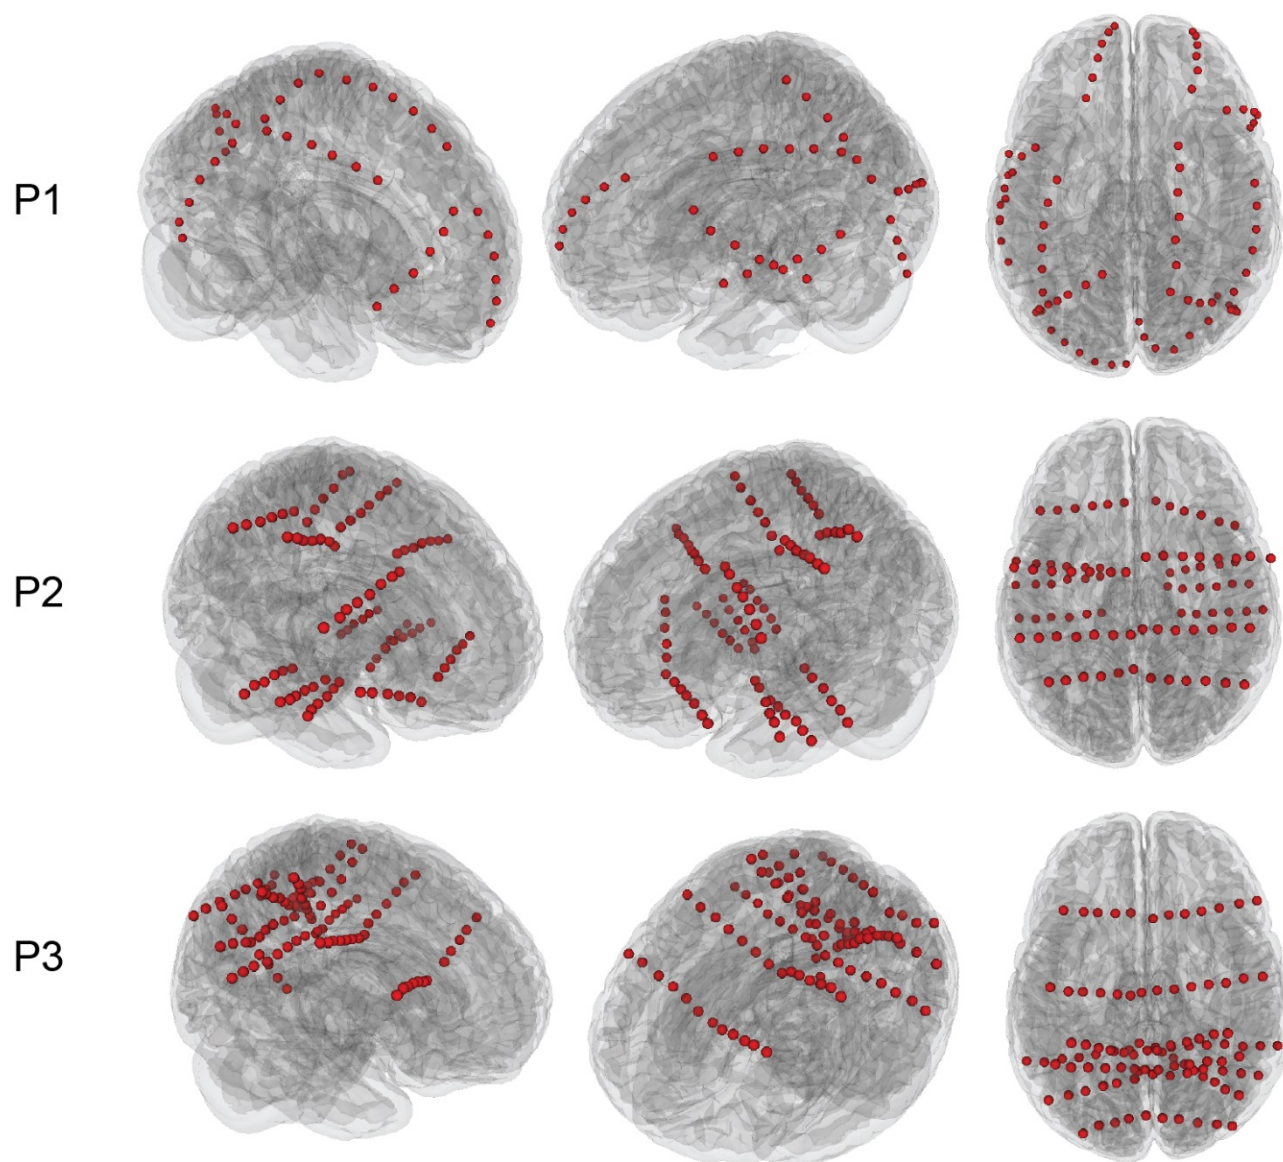

378

379

**Figure S1: Locations of implanted electrodes in the three participants**

Red circles denote the electrodes implanted in the three participants. Subdural strip electrodes were used in P1 while stereotactic EEG electrodes were used in P2 and P3

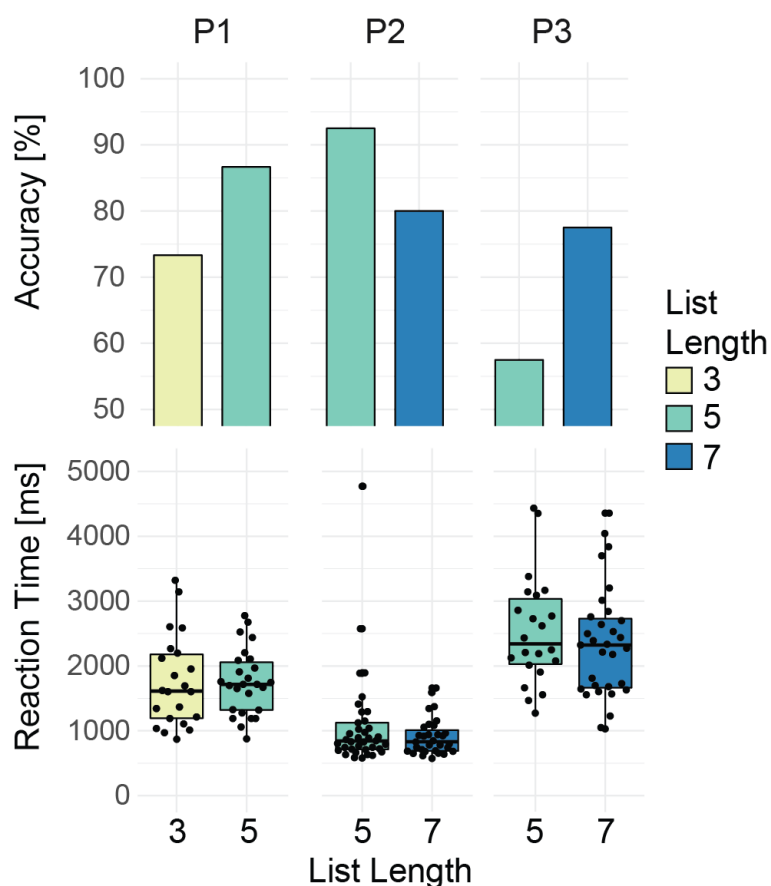

380

**Figure S2: WM performance in baseline session**

Accuracy and reaction time (in correct trials) were not statistically significant with increased list length.

381 **References:**

- 382 1. Lee, J. and S. Park, *Working memory impairments in schizophrenia: a meta-analysis*. J Abnorm  
383 Psychol, 2005. **114**(4): p. 599-611.
- 384 2. Baddeley, A.D., et al., *The decline of working memory in Alzheimer's disease. A longitudinal study*.  
385 Brain, 1991. **114 ( Pt 6)**: p. 2521-42.
- 386 3. Allen, D.N., et al., *Are working memory deficits in bipolar disorder markers for psychosis?*  
387 Neuropsychology, 2010. **24**(2): p. 244-54.
- 388 4. Owen, A.M., et al., *N-back working memory paradigm: a meta-analysis of normative functional*  
389 *neuroimaging studies*. Hum Brain Mapp, 2005. **25**(1): p. 46-59.
- 390 5. Rottschy, C., et al., *Modelling neural correlates of working memory: A coordinate-based meta-*  
391 *analysis*. Neuroimage, 2012. **60**(1): p. 830-846.
- 392 6. Wager, T.D. and E.E. Smith, *Neuroimaging studies of working memory: a meta-analysis*. Cogn Affect  
393 Behav Neurosci, 2003. **3**(4): p. 255-74.
- 394 7. Nee, D.E., et al., *A meta-analysis of executive components of working memory*. Cereb Cortex, 2013.  
395 **23**(2): p. 264-82.
- 396 8. Jensen, O., et al., *Oscillations in the alpha band (9-12 Hz) increase with memory load during*  
397 *retention in a short-term memory task*. Cereb Cortex, 2002. **12**(8): p. 877-82.



- 398 9. Jensen, O. and C.D. Tesche, *Frontal theta activity in humans increases with memory load in a*  
399 *working memory task*. Eur J Neurosci, 2002. **15**(8): p. 1395-9.
- 400 10. Gevins, A., et al., *High-resolution EEG mapping of cortical activation related to working memory:*  
401 *effects of task difficulty, type of processing, and practice*. Cereb Cortex, 1997. **7**(4): p. 374-85.
- 402 11. Raghavachari, S., et al., *Gating of human theta oscillations by a working memory task*. J Neurosci,  
403 2001. **21**(9): p. 3175-83.
- 404 12. Ma, L.S., et al., *Working memory load modulation of parieto-frontal connections: Evidence from*  
405 *dynamic causal modeling*. Human Brain Mapping, 2012. **33**(8): p. 1850-1867.
- 406 13. Dima, D., J. Jogia, and S. Frangou, *Dynamic causal modeling of load-dependent modulation of*  
407 *effective connectivity within the verbal working memory network*. Human Brain Mapping, 2014.  
408 **35**(7): p. 3025-3035.
- 409 14. Harding, I.H., et al., *Effective connectivity within the frontoparietal control network differentiates*  
410 *cognitive control and working memory*. Neuroimage, 2015. **106**: p. 144-53.
- 411 15. Rissman, J., A. Gazzaley, and M. D'Esposito, *Dynamic adjustments in prefrontal, hippocampal, and*  
412 *inferior temporal interactions with increasing visual working memory load*. Cerebral Cortex, 2008.  
413 **18**(7): p. 1618-1629.
- 414 16. Bahner, F., et al., *Hippocampal-Dorsolateral Prefrontal Coupling as a Species-Conserved Cognitive*  
415 *Mechanism: A Human Translational Imaging Study*. Neuropsychopharmacology, 2015. **40**(7): p.  
416 1674-1681.
- 417 17. Palva, J.M., et al., *Neuronal synchrony reveals working memory networks and predicts individual*  
418 *memory capacity*. Proc Natl Acad Sci U S A, 2010. **107**(16): p. 7580-5.
- 419 18. Zanto, T.P., et al., *Causal role of the prefrontal cortex in top-down modulation of visual processing*  
420 *and working memory*. Nat Neurosci, 2011. **14**(5): p. 656-61.
- 421 19. Sauseng, P., et al., *Fronto-parietal EEG coherence in theta and upper alpha reflect central executive*  
422 *functions of working memory*. Int J Psychophysiol, 2005. **57**(2): p. 97-103.
- 423 20. Payne, L. and J. Kounios, *Coherent oscillatory networks supporting short-term memory retention*.  
424 Brain Res, 2009. **1247**: p. 126-32.
- 425 21. Campo, P., et al., *Network reconfiguration and working memory impairment in mesial temporal*  
426 *lobe epilepsy*. Neuroimage, 2013. **72**: p. 48-54.
- 427 22. Peled, A., et al., *Functional connectivity and working memory in schizophrenia: an EEG study*. Int J  
428 Neurosci, 2001. **106**(1-2): p. 47-61.
- 429 23. Deserno, L., et al., *Reduced Prefrontal-Parietal Effective Connectivity and Working Memory Deficits*  
430 *in Schizophrenia*. Journal of Neuroscience, 2012. **32**(1): p. 12-20.
- 431 24. Lahr, J., et al., *Working Memory-Related Effective Connectivity in Huntington's Disease Patients*.  
432 Front Neurol, 2018. **9**: p. 370.
- 433 25. Postle, B.R., et al., *Repetitive transcranial magnetic stimulation dissociates working memory*  
434 *manipulation from retention functions in the prefrontal, but not posterior parietal, cortex*. J Cogn  
435 Neurosci, 2006. **18**(10): p. 1712-22.
- 436 26. Luber, B., et al., *Facilitation of performance in a working memory task with rTMS stimulation of the*  
437 *precuneus: Frequency- and time-dependent effects*. Brain Research, 2007. **1128**(1): p. 120-129.
- 438 27. Yamanaka, K., et al., *Transcranial magnetic stimulation of the parietal cortex facilitates spatial*  
439 *working memory: near-infrared spectroscopy study*. Cereb Cortex, 2010. **20**(5): p. 1037-45.
- 440 28. Mottaghy, F.M., et al., *Segregation of areas related to visual working memory in the prefrontal*  
441 *cortex revealed by rTMS*. Cerebral Cortex, 2002. **12**(4): p. 369-375.
- 442 29. Brunoni, A.R. and M.A. Vanderhasselt, *Working memory improvement with non-invasive brain*  
443 *stimulation of the dorsolateral prefrontal cortex: a systematic review and meta-analysis*. Brain  
444 Cogn, 2014. **86**: p. 1-9.



- 445 30. Mulquiney, P.G., et al., *Improving working memory: exploring the effect of transcranial random*  
446 *noise stimulation and transcranial direct current stimulation on the dorsolateral prefrontal cortex.*  
447 *Clin Neurophysiol*, 2011. **122**(12): p. 2384-9.
- 448 31. Keeser, D., et al., *Prefrontal direct current stimulation modulates resting EEG and event-related*  
449 *potentials in healthy subjects: a standardized low resolution tomography (sLORETA) study.*  
450 *Neuroimage*, 2011. **55**(2): p. 644-57.
- 451 32. Vosskuhl, J., R.J. Huster, and C.S. Herrmann, *Increase in short-term memory capacity induced by*  
452 *down-regulating individual theta frequency via transcranial alternating current stimulation.* *Front*  
453 *Hum Neurosci*, 2015. **9**: p. 257.
- 454 33. Alekseichuk, I., et al., *Spatial Working Memory in Humans Depends on Theta and High Gamma*  
455 *Synchronization in the Prefrontal Cortex.* *Curr Biol*, 2016. **26**(12): p. 1513-1521.
- 456 34. Polania, R., et al., *The importance of timing in segregated theta phase-coupling for cognitive*  
457 *performance.* *Curr Biol*, 2012. **22**(14): p. 1314-8.
- 458 35. Violante, I.R., et al., *Externally induced frontoparietal synchronization modulates network dynamics*  
459 *and enhances working memory performance.* *Elife*, 2017. **6**.
- 460 36. Jausovec, N., K. Jausovec, and A. Pahor, *The influence of theta transcranial alternating current*  
461 *stimulation (tACS) on working memory storage and processing functions.* *Acta Psychol (Amst)*, 2014.  
462 **146**: p. 1-6.
- 463 37. Fröhlich, F., *Experiments and models of cortical oscillations as a target for noninvasive brain*  
464 *stimulation.* *Progress in Brain Research*, 2015.
- 465 38. Hoy, K.E., et al., *Enhancement of Working Memory and Task-Related Oscillatory Activity Following*  
466 *Intermittent Theta Burst Stimulation in Healthy Controls.* *Cereb Cortex*, 2016. **26**(12): p. 4563-4573.
- 467 39. Esslinger, C., et al., *Induction and Quantification of Prefrontal Cortical Network Plasticity Using 5 Hz*  
468 *rTMS and fMRI.* *Human Brain Mapping*, 2014. **35**(1): p. 140-151.
- 469 40. Albouy, P., et al., *Selective Entrainment of Theta Oscillations in the Dorsal Stream Causally Enhances*  
470 *Auditory Working Memory Performance.* *Neuron*, 2017.
- 471 41. Kucewicz, M.T., et al., *Evidence for verbal memory enhancement with electrical brain stimulation in*  
472 *the lateral temporal cortex.* *Brain*, 2018.
- 473 42. Ezzyat, Y., et al., *Closed-loop stimulation of temporal cortex rescues functional networks and*  
474 *improves memory.* *Nat Commun*, 2018. **9**(1): p. 365.
- 475 43. Suthana, N., et al., *Memory enhancement and deep-brain stimulation of the entorhinal area.* *N Engl*  
476 *J Med*, 2012. **366**(6): p. 502-10.
- 477 44. Inman, C.S., et al., *Direct electrical stimulation of the amygdala enhances declarative memory in*  
478 *humans.* *Proc Natl Acad Sci U S A*, 2018. **115**(1): p. 98-103.
- 479 45. Rangarajan, V. and J. Parvizi, *Functional asymmetry between the left and right human fusiform*  
480 *gyrus explored through electrical brain stimulation.* *Neuropsychologia*, 2015.
- 481 46. Rangarajan, V., et al., *Electrical stimulation of the left and right human fusiform gyrus causes*  
482 *different effects in conscious face perception.* *J Neurosci*, 2014. **34**(38): p. 12828-36.
- 483 47. Kim, K., et al., *Network-based brain stimulation selectively impairs spatial retrieval.* *Brain Stimul*,  
484 2018. **11**(1): p. 213-221.
- 485 48. Fell, J., et al., *Memory modulation by weak synchronous deep brain stimulation: a pilot study.* *Brain*  
486 *Stimul*, 2013. **6**(3): p. 270-3.
- 487 49. Alagapan, S., et al., *Low-frequency direct cortical stimulation of left superior frontal gyrus enhances*  
488 *working memory performance.* *Neuroimage*, 2018. **184**: p. 697-706.
- 489 50. Vinck, M., et al., *An improved index of phase-synchronization for electrophysiological data in the*  
490 *presence of volume-conduction, noise and sample-size bias.* *Neuroimage*, 2011. **55**(4): p. 1548-65.
- 491 51. Yarkoni, T., et al., *Large-scale automated synthesis of human functional neuroimaging data.* *Nat*  
492 *Methods*, 2011. **8**(8): p. 665-70.

- 493 52. Fell, J. and N. Axmacher, *The role of phase synchronization in memory processes*. Nat Rev Neurosci, 2011. **12**(2): p. 105-18.
- 494
- 495 53. Ojemann, G.A., J. Ojemann, and N.F. Ramsey, *Relation between functional magnetic resonance*  
496 *imaging (fMRI) and single neuron, local field potential (LFP) and electrocorticography (ECoG)*  
497 *activity in human cortex*. Front Hum Neurosci, 2013. **7**: p. 34.
- 498 54. Butson, C.R. and C.C. McIntyre, *Tissue and electrode capacitance reduce neural activation volumes*  
499 *during deep brain stimulation*. Clin Neurophysiol, 2005. **116**(10): p. 2490-500.
- 500 55. Winawer, J. and J. Parvizi, *Linking Electrical Stimulation of Human Primary Visual Cortex, Size of*  
501 *Affected Cortical Area, Neuronal Responses, and Subjective Experience*. Neuron, 2016. **92**(6): p.  
502 1213-1219.
- 503 56. Lempka, S.F. and C.C. McIntyre, *Theoretical analysis of the local field potential in deep brain*  
504 *stimulation applications*. PLoS One, 2013. **8**(3): p. e59839.
- 505 57. Klimesch, W., *EEG alpha and theta oscillations reflect cognitive and memory performance: a review*  
506 *and analysis*. Brain Res Brain Res Rev, 1999. **29**(2-3): p. 169-95.
- 507 58. Hsieh, L.T. and C. Ranganath, *Frontal midline theta oscillations during working memory*  
508 *maintenance and episodic encoding and retrieval*. Neuroimage, 2014. **85 Pt 2**: p. 721-9.
- 509 59. Klimesch, W., et al., *A short review of slow phase synchronization and memory: Evidence for control*  
510 *processes in different memory systems?* Brain Research, 2008. **1235**: p. 31-44.
- 511 60. Sauseng, P., et al., *Control mechanisms in working memory: a possible function of EEG theta*  
512 *oscillations*. Neurosci Biobehav Rev, 2010. **34**(7): p. 1015-22.
- 513 61. Kawasaki, M., K. Kitajo, and Y. Yamaguchi, *Dynamic links between theta executive functions and*  
514 *alpha storage buffers in auditory and visual working memory*. European Journal of Neuroscience,  
515 2010. **31**(9): p. 1683-1689.
- 516 62. Sauseng, P., et al., *Brain oscillatory substrates of visual short-term memory capacity*. Curr Biol,  
517 2009. **19**(21): p. 1846-52.
- 518 63. Jensen, O. and A. Mazaheri, *Shaping functional architecture by oscillatory alpha activity: gating by*  
519 *inhibition*. Front Hum Neurosci, 2010. **4**: p. 186.
- 520 64. Sarnthein, J., et al., *Synchronization between prefrontal and posterior association cortex during*  
521 *human working memory*. Proc Natl Acad Sci U S A, 1998. **95**(12): p. 7092-6.
- 522 65. Axmacher, N., et al., *Interactions between medial temporal lobe, prefrontal cortex, and inferior*  
523 *temporal regions during visual working memory: A combined intracranial EEG and functional*  
524 *magnetic resonance imaging study*. Journal of Neuroscience, 2008. **28**(29): p. 7304-7312.
- 525 66. Schack, B., W. Klimesch, and P. Sauseng, *Phase synchronization between theta and upper alpha*  
526 *oscillations in a working memory task*. International Journal of Psychophysiology, 2005. **57**(2): p.  
527 105-114.
- 528 67. Daume, J., et al., *Phase-Amplitude Coupling and Long-Range Phase Synchronization Reveal*  
529 *Frontotemporal Interactions during Visual Working Memory*. J Neurosci, 2017. **37**(2): p. 313-322.
- 530 68. Lobier, M., J.M. Palva, and S. Palva, *High-alpha band synchronization across frontal, parietal and*  
531 *visual cortex mediates behavioral and neuronal effects of visuospatial attention*. Neuroimage, 2018.  
532 **165**: p. 222-237.
- 533 69. Sauseng, P., et al., *EEG alpha synchronization and functional coupling during top-down processing in*  
534 *a working memory task*. Human Brain Mapping, 2005. **26**(2): p. 148-155.
- 535 70. Roux, F. and P.J. Uhlhaas, *Working memory and neural oscillations: alpha-gamma versus theta-*  
536 *gamma codes for distinct WM information?* Trends Cogn Sci, 2014. **18**(1): p. 16-25.
- 537 71. Quentin, R., et al., *Visual Contrast Sensitivity Improvement by Right Frontal High-Beta Activity Is*  
538 *Mediated by Contrast Gain Mechanisms and Influenced by Fronto-Parietal White Matter*  
539 *Microstructure*. Cereb Cortex, 2016. **26**(6): p. 2381-90.
- 540 72. Zoefel, B., A. Archer-Boyd, and M.H. Davis, *Phase Entrainment of Brain Oscillations Causally*  
541 *Modulates Neural Responses to Intelligible Speech*. Curr Biol, 2018. **28**(3): p. 401-408 e5.

- 542 73. Kerren, C., et al., *An Optimal Oscillatory Phase for Pattern Reactivation during Memory Retrieval*.  
543 *Curr Biol*, 2018. **28**(21): p. 3383-3392 e6.
- 544 74. Kopell, N.J., et al., *Beyond the connectome: the dynamome*. *Neuron*, 2014. **83**(6): p. 1319-28.
- 545 75. Bassett, D.S. and O. Sporns, *Network neuroscience*. *Nat Neurosci*, 2017. **20**(3): p. 353-364.
- 546 76. Meltzer, J.A., et al., *Effects of working memory load on oscillatory power in human intracranial EEG*.  
547 *Cereb Cortex*, 2008. **18**(8): p. 1843-55.
- 548 77. Brainard, D.H., *The Psychophysics Toolbox*. *Spat Vis*, 1997. **10**(4): p. 433-6.
- 549 78. Delorme, A. and S. Makeig, *EEGLAB: an open source toolbox for analysis of single-trial EEG dynamics*  
550 *including independent component analysis*. *J Neurosci Methods*, 2004. **134**(1): p. 9-21.
- 551 79. Oostenveld, R., et al., *FieldTrip: Open source software for advanced analysis of MEG, EEG, and*  
552 *invasive electrophysiological data*. *Comput Intell Neurosci*, 2011. **2011**: p. 156869.
- 553 80. Stam, C.J., G. Nolte, and A. Daffertshofer, *Phase lag index: assessment of functional connectivity*  
554 *from multi channel EEG and MEG with diminished bias from common sources*. *Hum Brain Mapp*,  
555 2007. **28**(11): p. 1178-93.
- 556 81. Nolte, G., et al., *Identifying true brain interaction from EEG data using the imaginary part of*  
557 *coherency*. *Clin Neurophysiol*, 2004. **115**(10): p. 2292-307.
- 558 82. Lee, T.W., et al., *A unifying information-theoretic framework for independent component analysis*.  
559 *Computers & Mathematics with Applications*, 2000. **39**(11): p. 1-21.
- 560 83. Fedorov, A., et al., *3D Slicer as an image computing platform for the Quantitative Imaging Network*.  
561 *Magn Reson Imaging*, 2012. **30**(9): p. 1323-41.
- 562 84. Fonov, V., et al., *Unbiased average age-appropriate atlases for pediatric studies*. *Neuroimage*, 2011.  
563 **54**(1): p. 313-27.
- 564 85. Lancaster, J.L., et al., *Automated Talairach atlas labels for functional brain mapping*. *Hum Brain*  
565 *Mapp*, 2000. **10**(3): p. 120-31.
- 566 86. Penny, W.D., et al., *Statistical parametric mapping: the analysis of functional brain images*. 2011:  
567 Elsevier.
- 568 87. Brett, M., et al. *Region of interest analysis using an SPM toolbox*. in *8th international conference on*  
569 *functional mapping of the human brain*. 2002. Sendai.
- 570 88. Kuznetsova, A., P.B. Brockhoff, and R.H.B. Christensen, *lmerTest Package: Tests in Linear Mixed*  
571 *Effects Models*. *Journal of Statistical Software*, 2017. **82**(13): p. 1-26.
- 572 89. Lund, U., C. Agostinelli, and M.C. Agostinelli, *Package 'circular'*. 2017, Repository CRAN.

573
